# Supplementary material for: Impact of cancer mutational signatures on transcription factor motifs in the human genome
Source: PubMed Central journal article supplement (PMC6528224; doi:10.1186/s12920-019-0525-4), 2019-05-20

Creation

Disruption

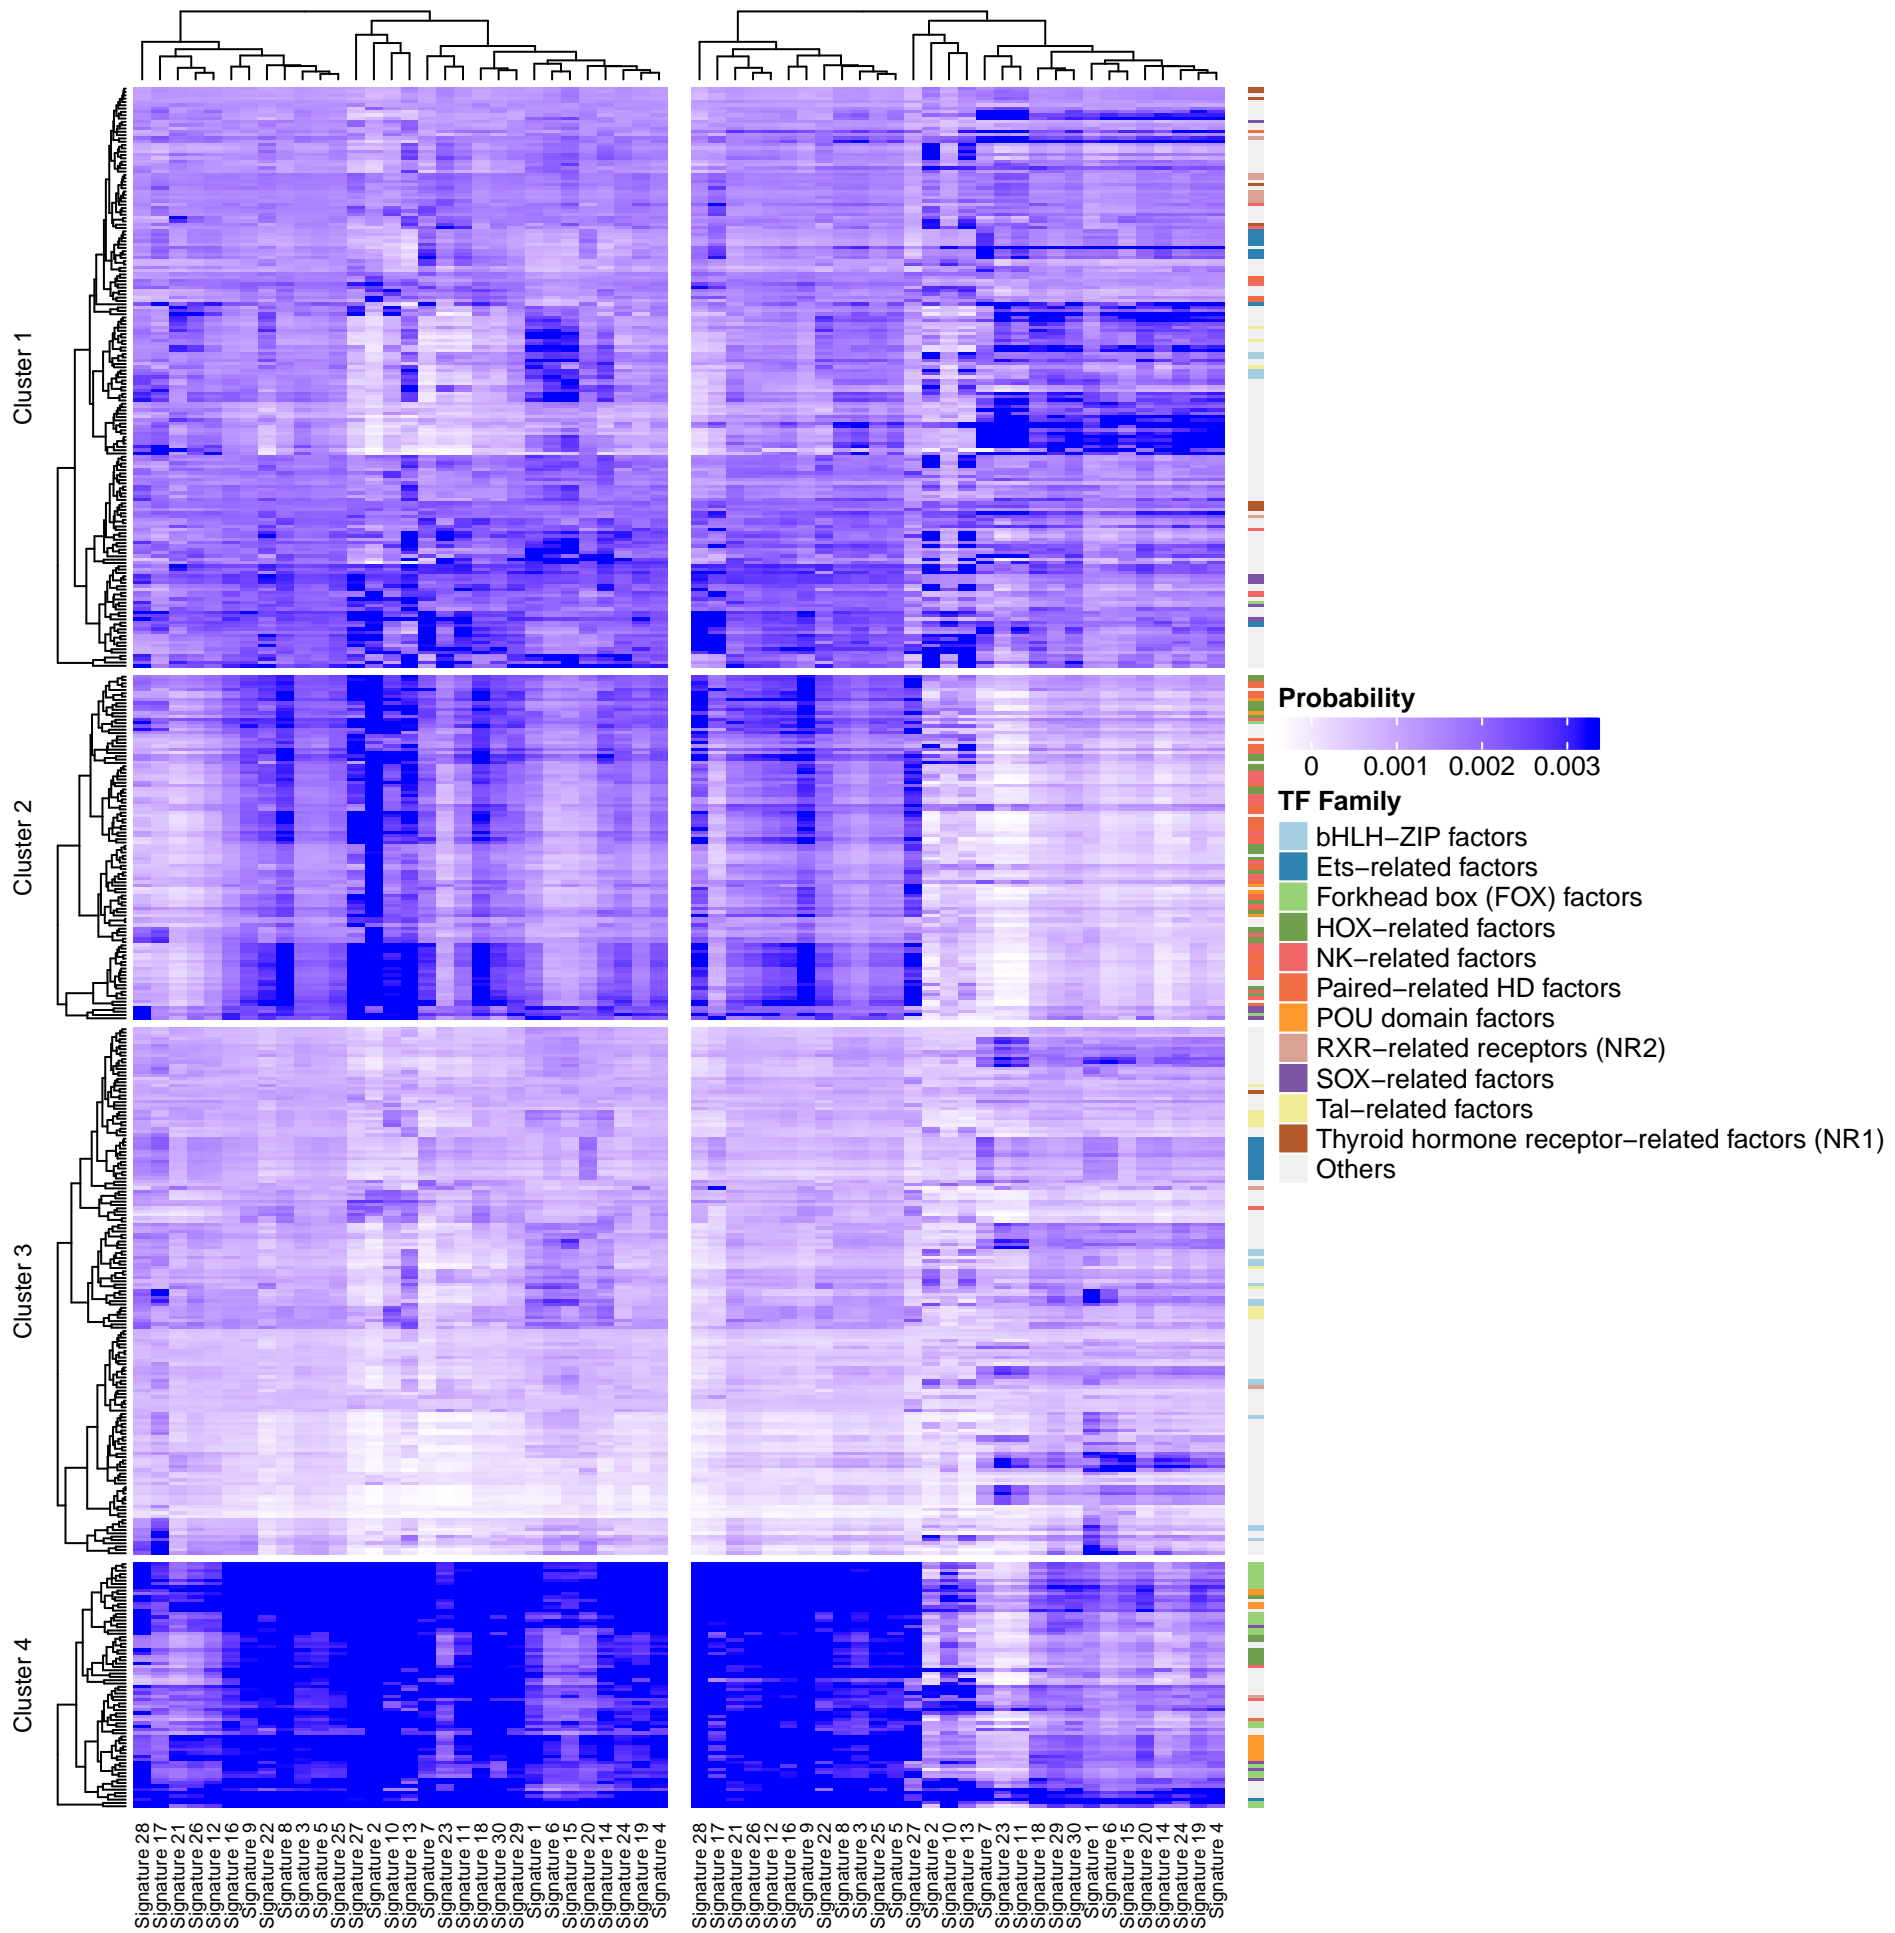

Supplement: 12920_2019_525_MOESM1_ESM.pdf [file 12920_2019_525_MOESM1_ESM.pdf]
