# Supplementary material for: Impact of cancer mutational signatures on transcription factor motifs in the human genome
Source: PubMed Central journal article supplement (PMC6528224; doi:10.1186/s12920-019-0525-4), 2019-05-20
Supplement: 12920_2019_525_MOESM4_ESM.pdf [file 12920_2019_525_MOESM4_ESM.pdf]

## TF PWM Alteration Probability Estimation Algorithm

To summarize, the alteration probability estimation algorithm consist of the following steps:

### 1. Scan all k-mer sequences

For  $i = 1$  to  $I$ , where  $i$  is the index of transcription factor set PWM

Obtain  $k$ , where  $k$  is the width of  $pwm(i)$

For  $p_k = 1$  to  $P_k$ , where  $p_k$  is the index of k-mer sequence set SEQ

Match  $pwm(i)$  against  $seq(p_k)$

If p-value  $> 0.001$

add  $seq(p_k)$  to MatchSEQ set

### 2. Counting every alteration event

For  $i = 1$  to  $I$ , where  $i$  is the index of transcription factor set PWM

For  $j = 1$  to  $J$ , where  $j$  is the index of element in MatchSEQ

For  $q_{trinuc} = 1$  to  $Q_{trinuc}$ , where  $q_{trinuc}$  is the index of the 96 mutation type

For  $n_{pos} = 1$  to  $(k-2)$ , where  $n_{pos}$  is the position in sequence  $matchseq_j$

If  $matchseq_j[n_{pos} : n_{pos} + 2] == mut(q_{trinuc}, ref)$

$mutseq = matchseq_j$

$mutseq[n_{pos} : n_{pos} + 2] = mut(q_{trinuc}, alt)$

If  $mutseq$  not in  $matchseq_j$

$count_{mut}(pwm(i), mut(q_{trinuc}), disrupt) + = count_{seq}(matchseq_j)$

$count_{mut}(pwm(i), mut(q_{trinuc}), create) + = count_{seq}(mutseq)$

### 3. Normalize probability

For  $i = 1$  to  $I$ , where  $i$  is the index of transcription factor set PWM

For  $q_{trinuc} = 1$  to  $Q_{trinuc}$ , where  $Q_{trinuc}$  is the index of the 96 mutation types

$$p_{mut}(pwm(i), mut(q_{trinuc}), disrupt) = \frac{count_{mut}(pwm(i), mut(q_{trinuc}), disrupt)}{count_{genome}(k, mut(q_{trinuc}, ref))}$$

$$p_{mut}(pwm(i), mut(q_{trinuc}), create) = \frac{count_{mut}(pwm(i), mut(q_{trinuc}), create)}{count_{genome}(k, mut(q_{trinuc}, ref))}$$

## Bayesian Inference of Transcription Factor Signature Alteration Probability

To compute the transcription factor signature alteration probability  $Pr(a|s_i, tf_k)$ , we have:

$$Pr(a|s_i, tf_k) = \sum_{j=1}^{96} Pr(a, m_j|s_i, tf_k) \quad (1)$$

Based on the Bayesian tree described in Fig 1c, we have the joint probability of all parameters described by Eq. 2.

$$Pr(a, tf_k, m_j, s_i) = Pr(a, tf_k|m_j)Pr(m_j|s_i)Pr(s_i) \quad (2)$$

$$Pr(a, tf_k, m_j|s_i) = Pr(a, tf_k|m_j)Pr(m_j|s_i)$$

$$\frac{Pr(a, tf_k, m_j|s_i)}{Pr(tf_k)} = \frac{Pr(a, tf_k|m_j)}{Pr(tf_k)} \cdot Pr(m_j|s_i)$$

$$Pr(a, m_j|s_i, tf_k) = Pr(a|m_j, tf_k)Pr(m_j|s_i) \quad (3)$$

Combining Eq. 3 and Eq. 1, we have Eq.(5) in the main text.
