# Supplementary material for: Impact of cancer mutational signatures on transcription factor motifs in the human genome
Source: PubMed Central journal article supplement (PMC6528224; doi:10.1186/s12920-019-0525-4), 2019-05-20
Supplement: 12920_2019_525_MOESM5_ESM.pdf [file 12920_2019_525_MOESM5_ESM.pdf]

## List of abbreviations for cancer types

|          |                                                                  |
|----------|------------------------------------------------------------------|
| ACC      | Adrenocortical carcinoma                                         |
| BLCA     | Bladder Urothelial Carcinoma                                     |
| BOCA     | Bone Cancer                                                      |
| BRCA     | Breast invasive carcinoma                                        |
| CESC     | Cervical squamous cell carcinoma and endocervical adenocarcinoma |
| CHOL     | Cholangiocarcinoma                                               |
| CLLE     | Chronic Lymphocytic Leukemia                                     |
| CMDI     | Chronic Myeloid Disorders                                        |
| COAD     | Colon adenocarcinoma                                             |
| COADREAD | Colorectal cancer                                                |
| DLBC     | Lymphoid Neoplasm Diffuse Large B-cell Lymphoma                  |
| EOPC     | Early Onset Prostate Cancer                                      |
| ESAD     | Esophageal Adenocarcinoma                                        |
| ESCA     | Esophageal carcinoma                                             |
| GBM      | Glioblastoma multiforme                                          |
| HNSC     | Head and Neck squamous cell carcinoma                            |
| KICH     | Kidney Chromophobe                                               |
| KIRC     | Kidney renal clear cell carcinoma                                |
| KIRP     | Kidney renal papillary cell carcinoma                            |
| LAML     | Acute Myeloid Leukemia                                           |
| LGG      | Brain Lower Grade Glioma                                         |
| LICA     | Liver Cancer                                                     |
| LIHC     | Liver hepatocellular carcinoma                                   |
| LINC     | Liver Cancer                                                     |
| LIRI     | Liver Cancer                                                     |
| LUAD     | Lung adenocarcinoma                                              |
| LUSC     | Lung squamous cell carcinoma                                     |
| MALY     | Malignant Lymphoma                                               |
| MESO     | Mesothelioma                                                     |
| NBL      | Neuroblastoma                                                    |
| ORCA     | Oral Cancer                                                      |
| OV       | Ovarian serous cystadenocarcinoma                                |
| PAAD     | Pancreatic adenocarcinoma                                        |
| PACA     | Pancreatic Cancer                                                |
| PAEN     | Pancreatic Cancer Endocrine neoplasms                            |
| PBCA     | Pediatric Brain Cancer                                           |
| PCPG     | Pheochromocytoma and Paraganglioma                               |
| PRAD     | Prostate adenocarcinoma                                          |
| READ     | Rectum adenocarcinoma                                            |
| RECA     | Renal Cancer                                                     |
| SARC     | Sarcoma                                                          |
| SKCM     | Skin Cutaneous Melanoma                                          |
| STAD     | Stomach adenocarcinoma                                           |
| TGCT     | Testicular Germ Cell Tumors                                      |
| THCA     | Thyroid carcinoma                                                |

|      |                                      |
|------|--------------------------------------|
| THYM | Thymoma                              |
| UCEC | Uterine Corpus Endometrial Carcinoma |
| UCS  | Uterine Carcinosarcoma               |
| UVM  | Uveal Melanoma                       |
