# Supplementary material for: Impact of cancer mutational signatures on transcription factor motifs in the human genome
Source: BMC Med Genomics. 2019 May 20;12:64. doi: 10.1186/s12920-019-0525-4 (PMC6528224; doi:10.1186/s12920-019-0525-4)

UMAP representation of PCAWG tumor samples

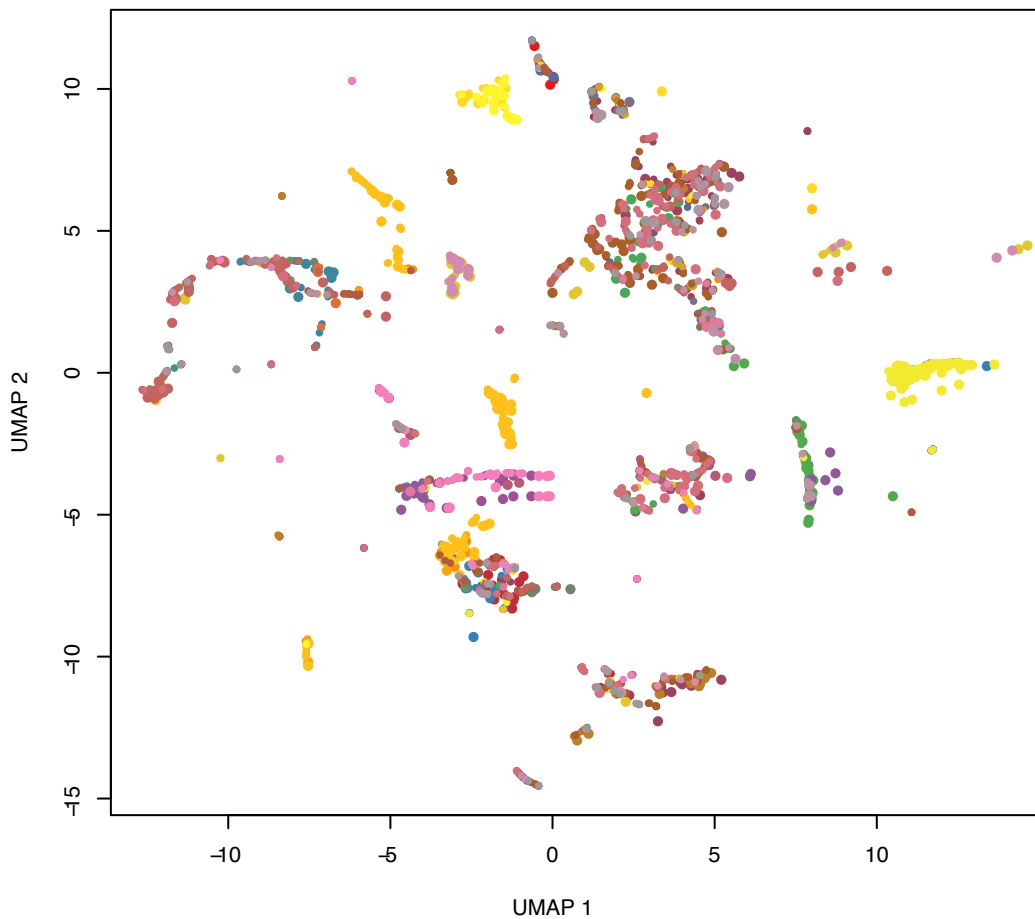

PCAWG subtypes

- BLCA
- BOCA
- BRCA
- BTCA
- CESC
- CLLE
- CMDI
- COAD
- DLBC
- EOPC
- ESAD
- GACA
- GBM
- HNSC
- KICH
- KIRC
- KIRP
- LAML
- LGG
- LICA
- LIHC
- LINC
- LIRI
- LUAD
- LUSC
- MALY
- MELA
- ORCA
- OV
- PACA
- PAEN
- PBCA
- PRAD
- READ
- RECA
- SARC
- SKCM
- STAD
- THCA
- UCEC

Clustering of PCAWG samples based on exposures

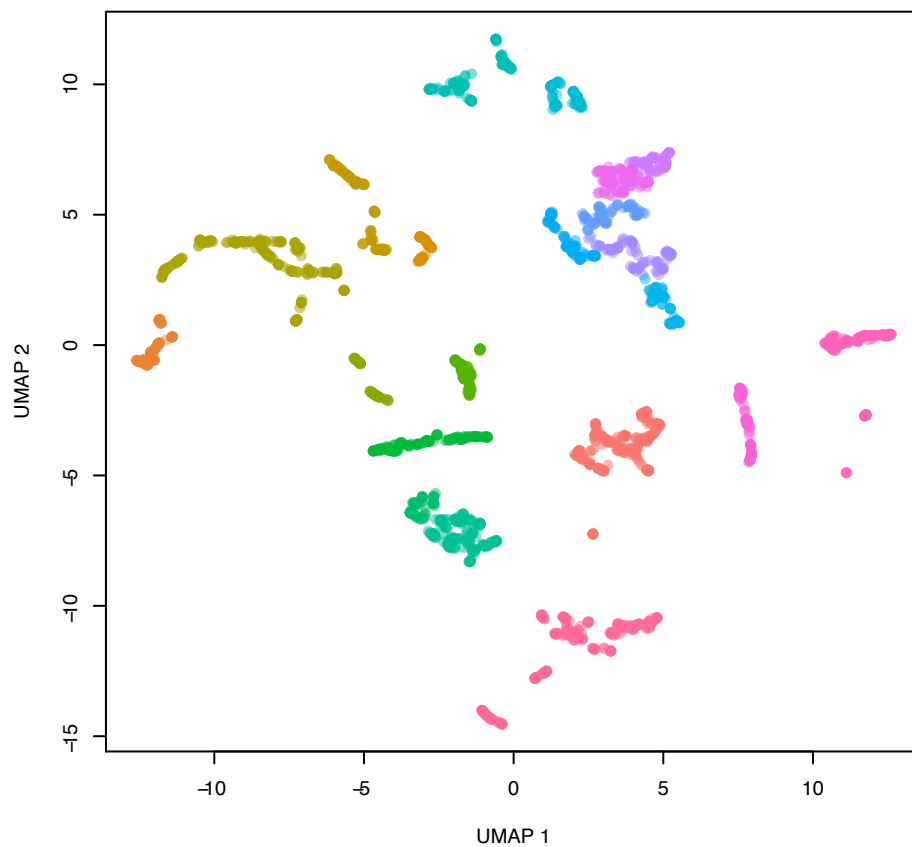

Clusters

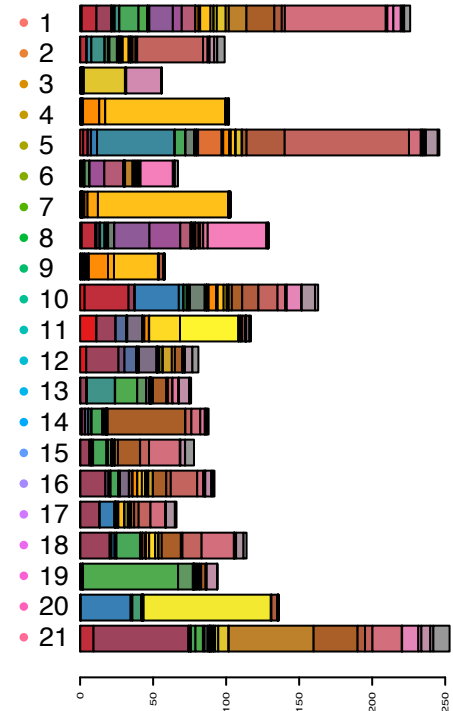

Supplement: Supplementary file 3 — (top) UMAP representation of the 2708 WGS samples from PCAWG, according to their exposure to the mutational signatures. Colors indicate the tumor subtype. (bottom) Clustering of the UMAP map using hdbscan. The number of samples within each cluster and their tumor subtype is indicated as a barplot (bottom right). (pdf 245 kb) [file 12920_2019_525_MOESM3_ESM.pdf]
